# Supplementary material for: Fluorescence enhancement and pKa shift of a rho kinase inhibitor by a synthetic receptor
Source: Royal Society of Chemistry journal article supplement (doi:10.1039/c7ob00547d), 2017-01-01
Supplement: c7ob00547d1.pdf [file c7ob00547d1.pdf]

## Fluorescence enhancement and $pK_a$ shift of a Rho kinase inhibitor by a synthetic receptor

Hang Yin,<sup>a</sup> Linmin Chen,<sup>a</sup> Binrui Yang,<sup>a</sup> David Bardelang,<sup>b</sup> Chunming Wang,<sup>a</sup> Simon M. Y. Lee<sup>a</sup>  
and Ruibing Wang\*<sup>a</sup>

<sup>a</sup> State Key Laboratory of Quality Research in Chinese Medicine, Institute of Chinese Medical Sciences, University of Macau, Taipa, Macau, China

<sup>b</sup> <sup>1</sup>Aix Marseille Univ, CNRS, ICR, Marseille, France

\* Correspondence should be addressed to Prof. Ruibing Wang: [rwang@umac.mo](mailto:rwang@umac.mo); Tel.: +853-8822-4689

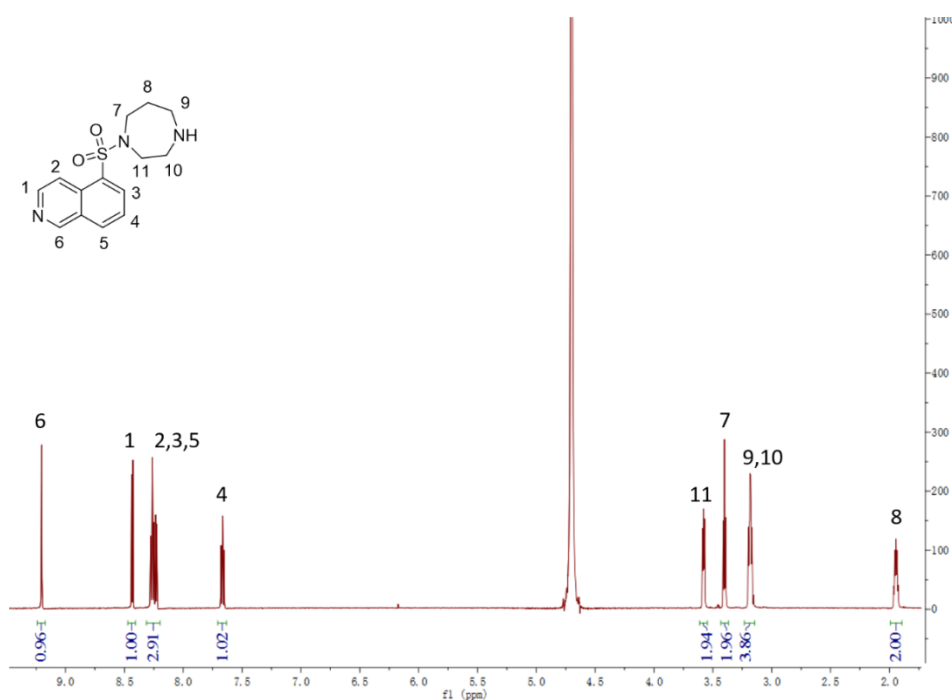

Fig. S1 <sup>1</sup>H NMR spectrum of FSD in D<sub>2</sub>O.

### Details of DFT calculations.

The inclusion complexes (different heights of the guest included in CB[7]) were first constructed using Chem3D before calculations by energy-minimization using DFT (B3LYP/6-31G(d)) thanks to the Gaussian09 Rev.D01 package program. A water continuum (CPCM) model was used to account as best as possible of the solvent in a compromise approach between calculation time and efficiency with respect to a discrete model for water molecules. Frequency calculations were performed to check for true minimas and BSSE corrections applied to account for possible basis set superposition errors.

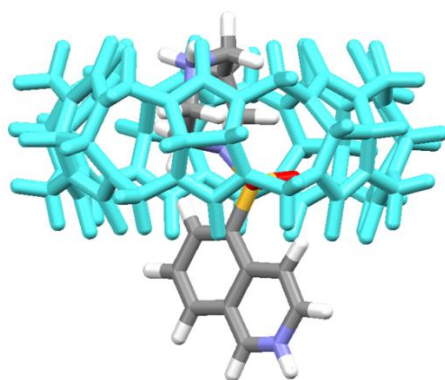

Fig. S2 Molecular modeling of (FSD-1H)<sup>+</sup>@CB[7] calculated by Density Functional Theory (DFT, B3LYP/6-31G(d)).

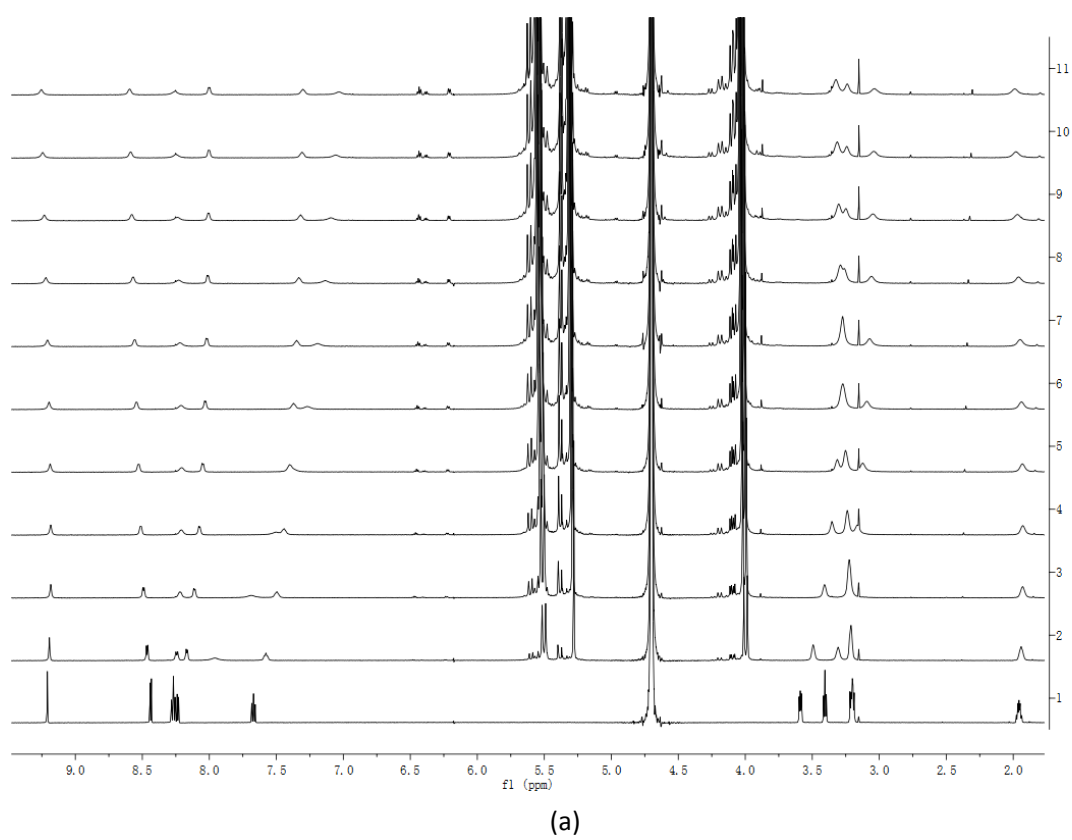

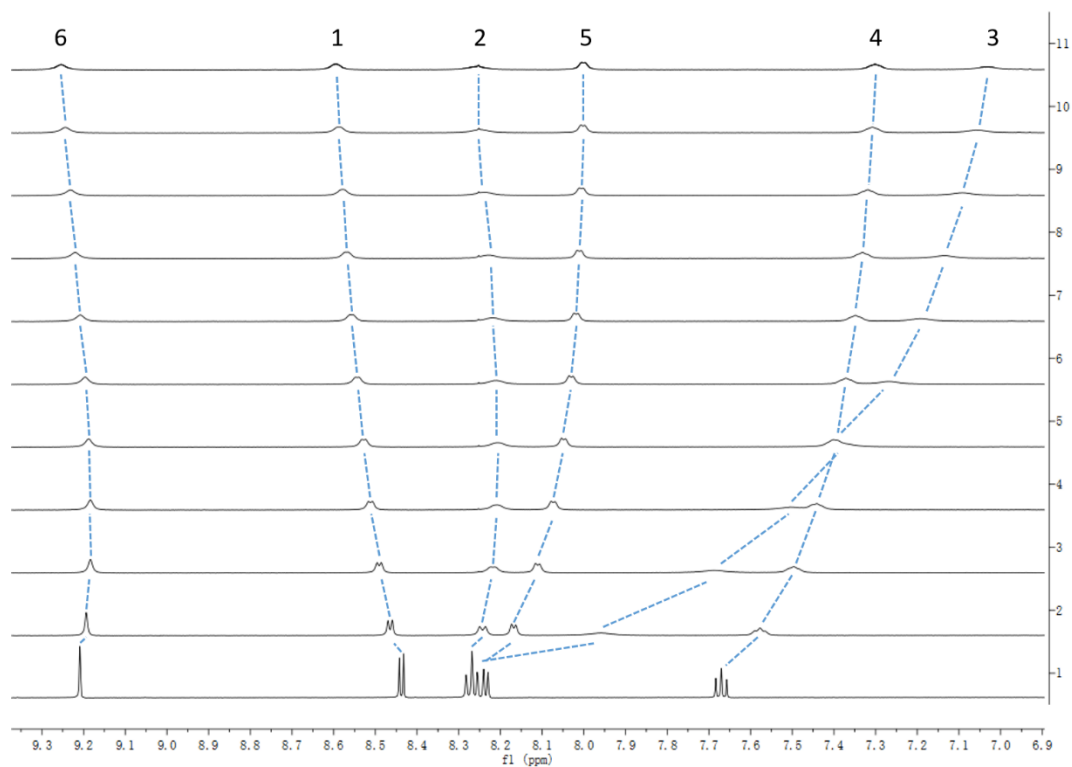

(b)

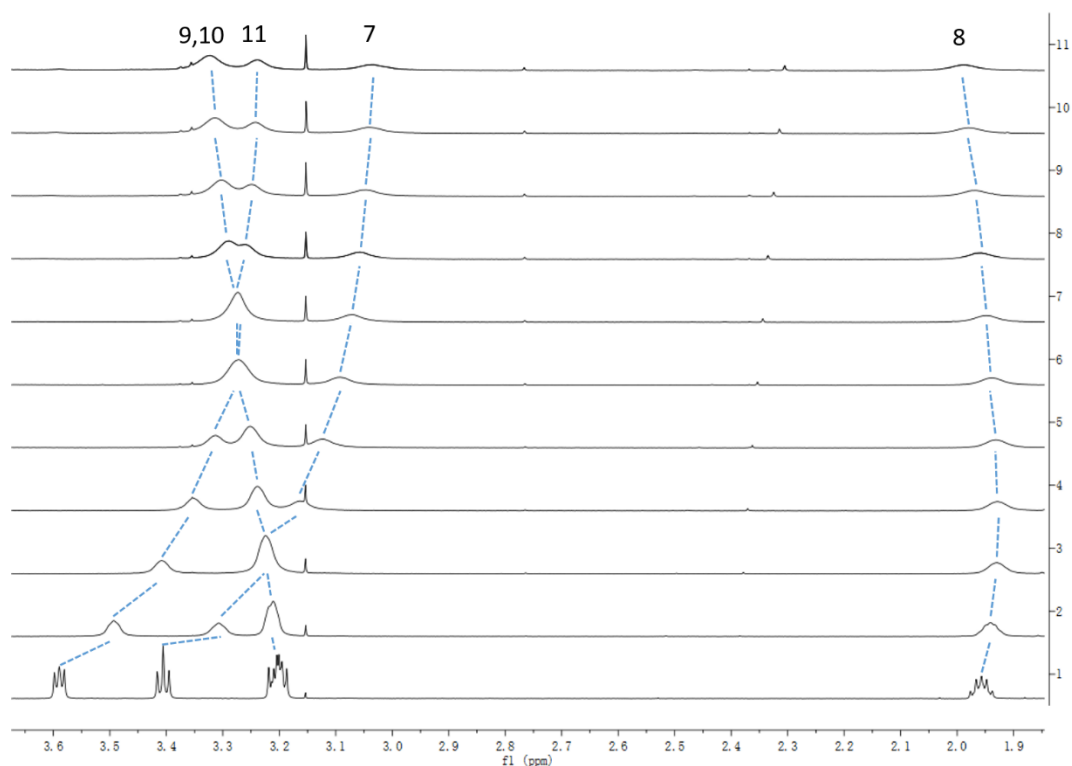

(c)

Fig. S3  $^1\text{H}$  NMR stack spectra of NMR titration (with increasing CB[7] concentrations from bottom to top) of FSD@CB[7] (a), downfield of stack spectra (b) and upfield of stack spectra (c).

Table S1. Binding affinities of FSD@CB[7] calculated by each proton according to the  $^1\text{H}$  NMR stack spectra of NMR titration.

| Proton | $K_a$ ( $\text{M}^{-1}$ ) |
|--------|---------------------------|
| H(1)   | $483.7 \pm 34.9$          |
| H(2)   | NA                        |
| H(3)   | $1098.4 \pm 55.3$         |
| H(4)   | $1165.8 \pm 34.2$         |
| H(5)   | $1674.5 \pm 99.7$         |
| H(6)   | NA                        |
| H(7)   | $1358.8 \pm 83.9$         |
| H(8)   | NA                        |
| H(9)   | $147.8 \pm 27.2$          |
| H(10)  | $147.8 \pm 27.2$          |
| H(11)  | $1647.7 \pm 156.3$        |

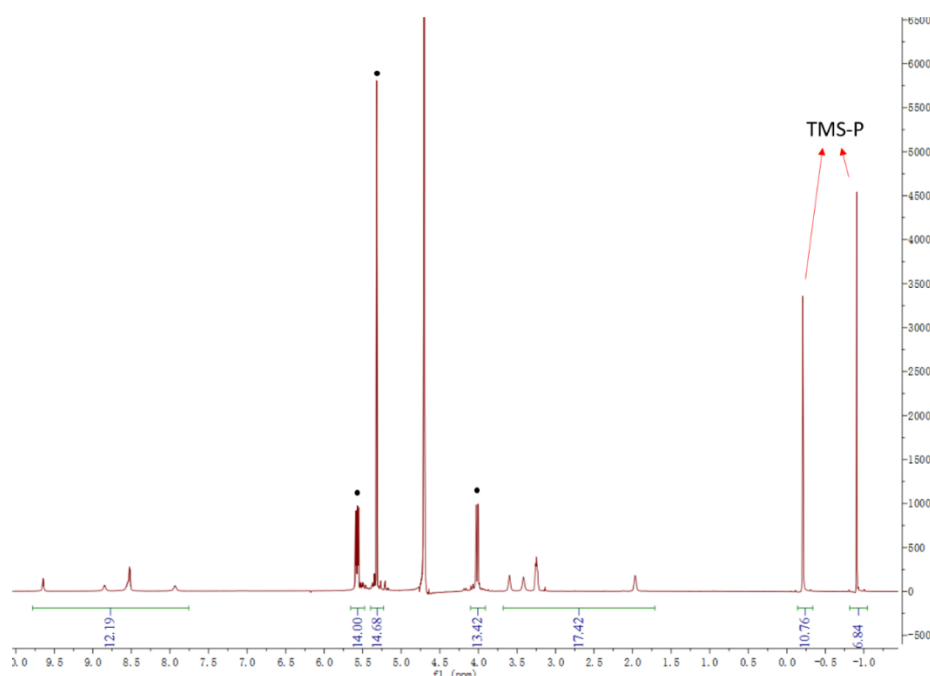

Fig. S4  $^1\text{H}$  NMR spectrum of competitive binding between FSD and TMS-P to CB[7] in acidic condition ( $\text{pD} = 2.0$ ).

#### Binding constant of {FSD•CB[7]}

$$[\text{TMS-P}]_{\text{bound}} = 6.84/9 = 0.76 \text{ mM};$$

$$[\text{TMS-P}]_{\text{free}} = 10.76/9 = 1.20 \text{ mM};$$

$$[\text{FSD}]_{\text{total}} = 29.61/16 = 1.85 \text{ mM};$$

$$[\text{CB[7]}]_{\text{total}} = 1 \text{ mM};$$

$$\text{Therefore, } [\text{FSD}]_{\text{bound}} = [\text{CB[7]}]_{\text{total}} - [\text{TMS-P}]_{\text{bound}} = 1 - 0.76 = 0.24 \text{ mM};$$

$$[\text{FSD}]_{\text{free}} = 1.85 - 0.24 \text{ mM} = 1.61 \text{ mM};$$

$$\text{As } K_{\text{FSD} \cdot \text{CB[7]}}/K_{\text{TMS-P} \cdot \text{CB[7]}} = [\text{FSD} \cdot \text{CB[7]}]_{\text{complex}} \times [\text{TMS-P}]_{\text{free}} / ([\text{TMS-P} \cdot \text{CB[7]}]_{\text{complex}} \times [\text{FSD}]_{\text{free}}) = 0.24 \times 1.20 / (0.76 \times 1.61) = 0.235 \text{ and } K_{\text{TMS-P} \cdot \text{CB[7]}} = (1.82 \pm 0.22) \times 10^7 \text{ M}^{-1};$$

$$\text{Therefore, } K_{\text{IC8} \cdot \text{CB[7]}} = (4.28 \pm 0.21) \times 10^6 \text{ M}^{-1}.$$

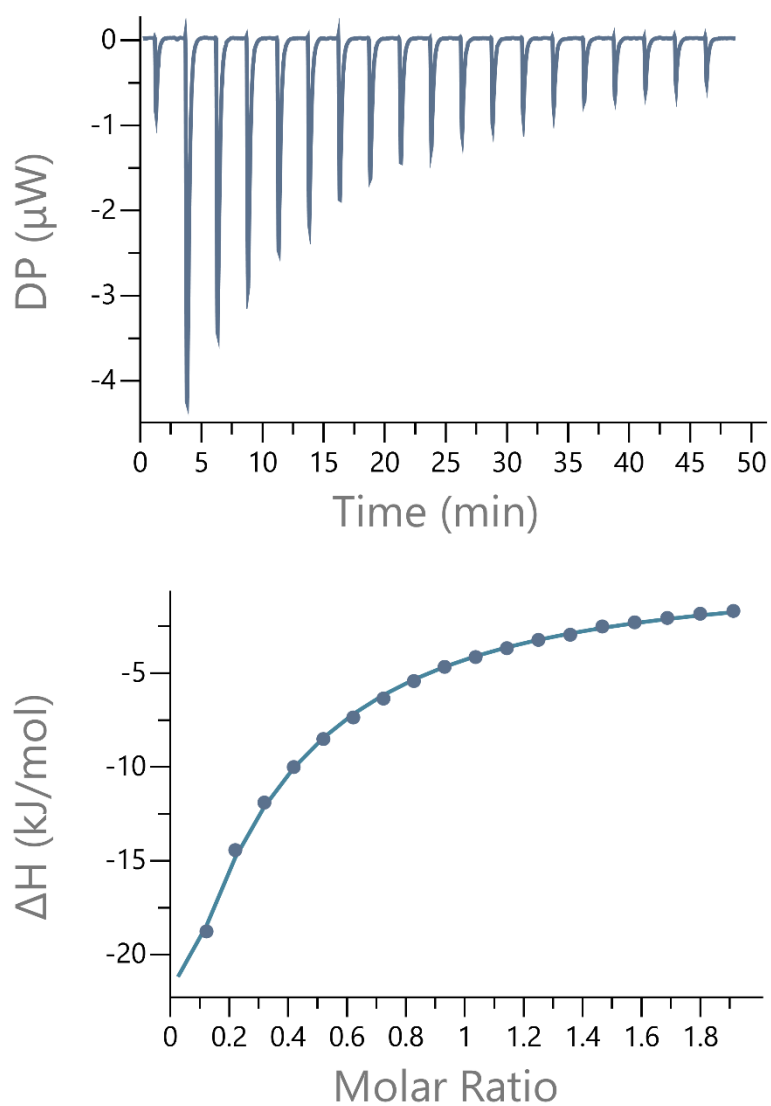

Fig. S5 Raw plot and integrated heat plot of FSD at syringe with CB[7] at cell in neutral condition (pH = 7.0).

Table S2. ITC results of FSD with CB[7] in neutral condition (pH = 7.0).

| Syringe | Cell  | [Syr]<br>(M)       | [Cell]<br>(M)      | $K_a$ ( $\text{M}^{-1}$ )    | $\Delta H$<br>(kJ/mol) | $\Delta G$<br>(kJ/mol) | $T\Delta S$<br>(kJ/mol) |
|---------|-------|--------------------|--------------------|------------------------------|------------------------|------------------------|-------------------------|
| CB[7]   | FSD   | $2 \times 10^{-3}$ | $1 \times 10^{-4}$ | $6.62(\pm 1.22) \times 10^3$ | -335                   | -21.8                  | -313                    |
| FSD     | CB[7] | $2 \times 10^{-3}$ | $2 \times 10^{-4}$ | $6.66(\pm 1.62) \times 10^3$ | -335                   | -21.9                  | -313                    |

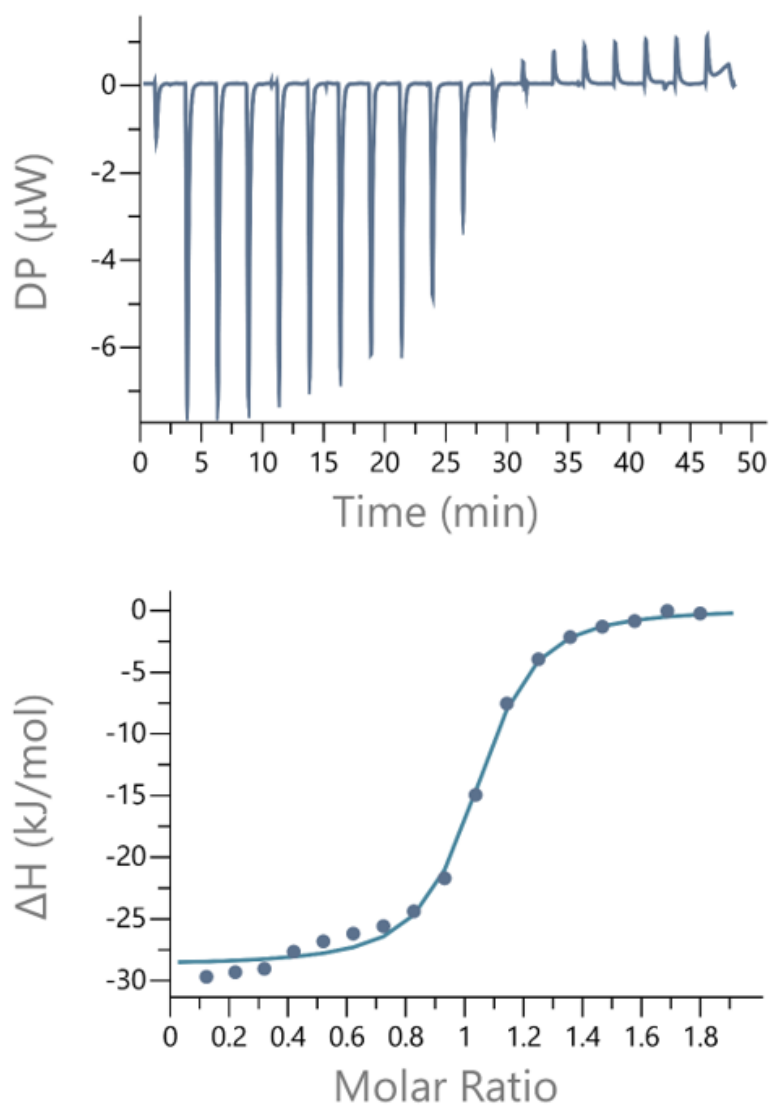

Fig. S6 Raw plot and integrated heat plot of CB[7] at syringe with FSD at cell in neutral condition (pH = 2.0).

Table S3. ITC results of FSD with CB[7] in acidic condition (pH = 2.0).

| Syringe | Cell  | [Syr]<br>(M)       | [Cell]<br>(M)      | $K_a$ ( $\text{M}^{-1}$ )    | $\Delta H$<br>(kJ/mol) | $\Delta G$<br>(kJ/mol) | $T\Delta S$<br>(kJ/mol) |
|---------|-------|--------------------|--------------------|------------------------------|------------------------|------------------------|-------------------------|
| CB[7]   | FSD   | $2 \times 10^{-3}$ | $2 \times 10^{-4}$ | $5.26(\pm 0.73) \times 10^5$ | -28.9                  | -32.7                  | 3.74                    |
| FSD     | CB[7] | $1 \times 10^{-3}$ | $8 \times 10^{-5}$ | $1.61(\pm 0.11) \times 10^6$ | -35.2                  | -35.5                  | 0.268                   |

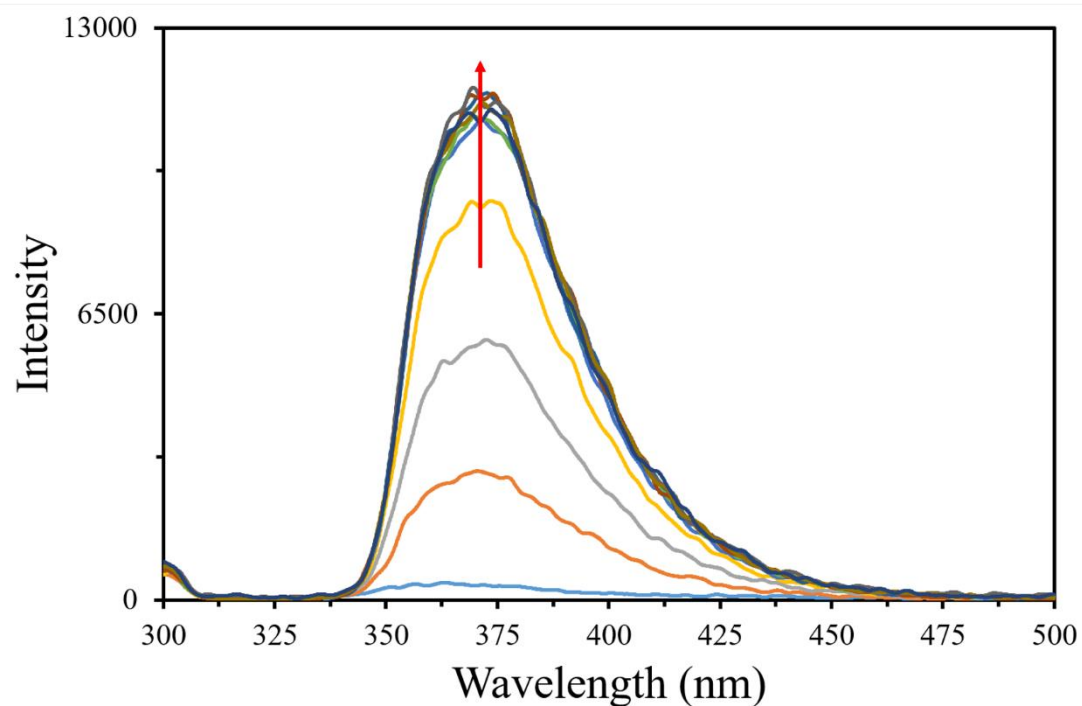

(a)

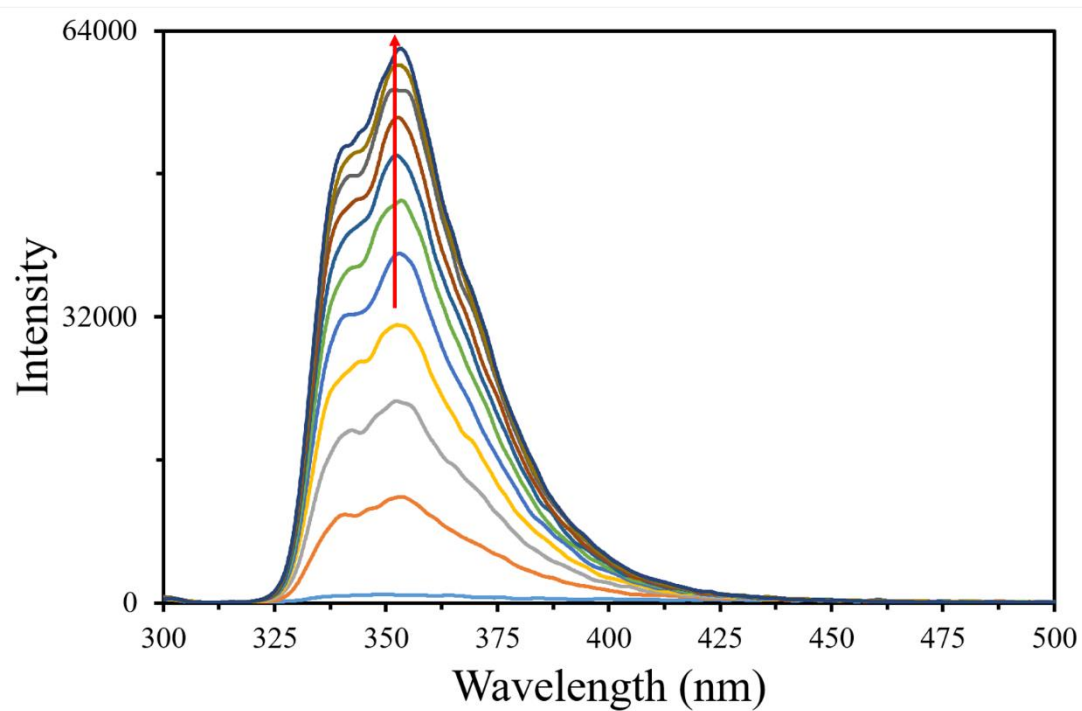

(b)

Fig. S7 Fluorescence spectrum of FSD in the absence and in the presence of CB[7] (up to 3.0 equivalent) in acidic condition (a) and in neutral condition (b).
